# Supplementary material
Source: ML conference proceedings conference paper supplement (https://proceedings.mlr.press/v124/deshpande20a.html)
Supplement: Supplementary file 1 [file deshpande20a-supp.pdf]

## A Appendix

### A.1 Result on Real world datasets

#### A.1.1 Results on Shuttle dataset

**Shuttle** training data set from UCI Machine Learning Repository [22] contains 43,500 points. We run robust  $k$ -means++ on the **Shuttle** dataset with  $k \in \{5, 10, 15\}$ , and  $\delta = \{0.05, 0.1\}$ . We compare its performance with vanilla  $k$ -means++ and random initialization. We summarise our empirical findings in Tables 12, 13, 14, 15.

**Insight.** We notice that in almost every scenario robust  $k$ -means++ outperforms random initialization. On the comparison with  $k$ -means++ our algorithm gives comparable/better cost for all values of  $k$ . Specifically, our average cost is better than  $k$ -means++ on most of the instances. Our running time is slower albeit comparable to that of  $k$ -means++.

#### A.2 Result on Synthetic datasets

We recall the dataset generation step as follows. We pick  $k + z$  uniformly random points from a large  $d$ -dimensional hypercube of side length  $s = 100$ . We use  $k$  points from them as means and pick  $n/k$  points around each of them from a random Gaussian of unit variance. This gives a data set of  $n + z$  points with  $n$  points clustered into  $k$  clusters and the remaining  $z$  as outliers. We first run robust  $k$ -means++ with the values of  $\alpha \in \{0, 0.25, 0.5, 1\}$ ,  $\delta \in \{0.05, 0.1\}$  on the synthetic datasets with values  $n = 1000$ ,  $d = 2$ ,  $k = 20$ , and the number of outliers  $\{25, 50, 120\}$ . We summarised our results in Tables 16,17,18.

**Insight.** We notice that in almost every scenario robust  $k$ -means++ outperforms random initialization. On the comparison with  $k$ -means++ our

algorithm offers better performance in all the metric – **min**, **mean**, **med** cost – on all possible values of  $k, \alpha, \delta$ . Our running time is slower albeit comparable to that of  $k$ -means++ and TKM++.

| Result                     | $\alpha$ | Cost        |             |             | Time(s) |
|----------------------------|----------|-------------|-------------|-------------|---------|
|                            |          | Min         | Mean        | Med.        |         |
| This work<br>$\delta=0.05$ | 0        | 1.86        | 2.1         | 2.02        | 9.5     |
|                            | 0.25     | 1.90        | 2.08        | 2.02        | 9.5     |
|                            | 0.5      | 1.85        | 2.06        | 2.02        | 9.5     |
|                            | 0.75     | 1.69        | <b>2.02</b> | <b>2.00</b> | 9.5     |
| This work<br>$\delta=0.1$  | 1        | 2.46        | 2.86        | 2.60        | 9.5     |
|                            | 0        | 1.87        | 2.08        | 2.02        | 5.3     |
|                            | 0.25     | 1.85        | 2.04        | 2.01        | 5.3     |
|                            | 0.5      | 1.85        | 2.07        | 2.01        | 5.3     |
| This work<br>$\delta=0.1$  | 0.75     | <b>1.66</b> | 2.08        | 2.03        | 5.3     |
|                            | 1        | 2.24        | 2.67        | 2.60        | 5.3     |
|                            | TKM++    | 1.7         | 2.26        | 2.23        | 3.42    |
| KM++                       | 1.8      | 2.4         | 2.36        | 1.6         |         |
| RAND                       | 2.6      | 2.9         | 2.61        | 0.74        |         |

Table 12: Robust  $k$ -means++ on **Shuttle** dataset with  $k = 5$ . We delete the farthest 21 points. All cost are multiplicative of  $10^8$ .

| Result                     | $\alpha$ | Cost        |             |             | Time(s) |
|----------------------------|----------|-------------|-------------|-------------|---------|
|                            |          | Min         | Mean        | Med.        |         |
| This work<br>$\delta=0.05$ | 0        | 8.1         | 8.87        | 8.92        | 22.4    |
|                            | 0.25     | 7.89        | 8.79        | 8.67        | 22.4    |
|                            | 0.5      | 6.99        | 8.58        | 8.76        | 22.4    |
|                            | 0.75     | <b>6.67</b> | 8.56        | 8.56        | 22.4    |
| This work<br>$\delta=0.1$  | 1        | 9.47        | 12.4        | 12.6        | 22.4    |
|                            | 0        | 7.73        | 8.89        | 8.69        | 11.5    |
|                            | 0.25     | 6.8         | 8.86        | 9.11        | 11.5    |
|                            | 0.5      | 6.98        | 8.54        | 8.58        | 11.5    |
| This work<br>$\delta=0.1$  | 0.75     | 6.95        | <b>8.31</b> | <b>8.11</b> | 11.5    |
|                            | 1        | 9.72        | 12          | 12.6        | 11.5    |
|                            | TKM++    | 7.0         | 8.8         | 8.9         | 7.35    |
| KM++                       | 7.12     | 8.94        | 9.08        | 3.5         |         |
| RAND                       | 9.66     | 11.6        | 11.3        | 1.37        |         |

Table 13: Robust  $k$ -means++ on **Shuttle** dataset with  $k = 10$ . We delete the farthest 34 as outliers. All cost are multiplicative of  $10^7$ .

| Result                     | $\alpha$ | Cost        |            |             | Time(s) |
|----------------------------|----------|-------------|------------|-------------|---------|
|                            |          | Min         | Mean       | Med.        |         |
| This work<br>$\delta=0.05$ | 0        | 6.2         | <b>7.2</b> | <b>7.15</b> | 37.5    |
|                            | 0.25     | 6.6         | 7.43       | 7.19        | 37.5    |
|                            | 0.5      | 6.05        | 7.26       | 7.18        | 37.5    |
|                            | 0.75     | 6.16        | 7.74       | 7.71        | 37.5    |
|                            | 1        | 12.6        | 17.9       | 18.3        | 37.5    |
| This work<br>$\delta=0.1$  | 0        | 6.24        | 7.54       | 7.37        | 19.5    |
|                            | 0.25     | 6.34        | 7.22       | 7.14        | 19.5    |
|                            | 0.5      | 6.37        | 7.68       | 7.69        | 19.5    |
|                            | 0.75     | <b>5.82</b> | 7.27       | 7.32        | 19.5    |
|                            | 1        | 12.2        | 19.4       | 19.2        | 19.5    |
| TKM ++                     |          | 6.1         | 7.7        | 7.9         | 12.2    |
| KM ++                      |          | 6.78        | 8.22       | 8.01        | 5.4     |
| RAND                       |          | 14.1        | 16.3       | 15.1        | 1.98    |

Table 14: Robust  $k$ -means++ on Shuttle dataset with  $k = 15$ . We delete the farthest 17 as outliers. All cost are multiplicative of  $10^7$ .

| Result                     | $\alpha$ | Cost        |             |             | Time(s) |
|----------------------------|----------|-------------|-------------|-------------|---------|
|                            |          | Min         | Mean        | Med.        |         |
| This work<br>$\delta=0.05$ | 0        | 4.2         | 4.94        | 4.91        | 37.5    |
|                            | 0.25     | 4.2         | 5           | 5.03        | 37.5    |
|                            | 0.5      | 4.41        | 5.04        | 4.84        | 37.5    |
|                            | 0.75     | 4.21        | 4.99        | 4.94        | 37.5    |
|                            | 1        | 3.94        | 4.98        | 4.93        | 37.5    |
| This work<br>$\delta=0.1$  | 0        | 4.13        | 4.96        | 5.01        | 19.5    |
|                            | 0.25     | 4.54        | 5.09        | 5.07        | 19.5    |
|                            | 0.5      | 4.29        | 4.92        | 4.90        | 19.5    |
|                            | 0.75     | 4.13        | <b>4.56</b> | <b>4.57</b> | 19.5    |
|                            | 1        | 4.22        | 5.28        | 5.37        | 19.5    |
| TKM ++                     |          | 3.6         | 4.8         | 4.8         | 11.2    |
| KM ++                      |          | 3.89        | 4.58        | <b>4.57</b> | 5.4     |
| RAND                       |          | <b>3.10</b> | 4.91        | 5.34        | 2.02    |

Table 15: Robust  $k$ -means++ on Shuttle dataset with  $k = 15$ . We delete the farthest 51 as outliers. All cost are multiplicative of  $10^7$ .

| Result                     | $\alpha$ | Cost        |             |             | Time(s) |
|----------------------------|----------|-------------|-------------|-------------|---------|
|                            |          | Min         | Mean        | Med.        |         |
| This work<br>$\delta=0.05$ | 0        | 2035        | 2816        | 2733        | 12      |
|                            | 0.25     | 2719        | 3099        | 3272        | 12      |
|                            | 0.5      | 2036        | 2766        | 2581        | 12      |
|                            | 0.75     | 2543        | 3101        | 2927        | 12      |
|                            | 1        | 1996        | 2297        | 2298        | 12      |
| This work<br>$\delta=0.1$  | 0        | 2547        | 2834        | 2666        | 6.5     |
|                            | 0.25     | 2031        | 2737        | 2577        | 6.5     |
|                            | 0.5      | 2542        | 2959        | 3072        | 6.5     |
|                            | 0.75     | 2032        | 2408        | 2297        | 6.5     |
|                            | 1        | <b>1907</b> | <b>2069</b> | <b>2037</b> | 6.5     |
| TKM ++                     |          | 2261        | 2340        | 3415        | 0.52    |
| KM ++                      |          | 2561        | 4840        | 4145        | 0.2     |
| RAND                       |          | 5443        | 17977       | 13753       | 0.07    |

Table 16: Robust  $k$ -means++ on Synthetic dataset with  $\delta = 0.1$ .  $n = 1000, d = 2, k = 20$ . We delete the farthest 25 as outliers.

| Result                     | $\alpha$ | Cost        |             |             | Time(s) |
|----------------------------|----------|-------------|-------------|-------------|---------|
|                            |          | Min         | Mean        | Med.        |         |
| This work<br>$\delta=0.05$ | 0        | 1880        | 1907        | 1912        | 12      |
|                            | 0.25     | 1890        | 1908        | 1906        | 12      |
|                            | 0.5      | 1884        | 1909        | 1904        | 12      |
|                            | 0.75     | 1892        | 1921        | 1908        | 12      |
|                            | 1        | 1753        | 1879        | 1893        | 12      |
| This work<br>$\delta=0.1$  | 0        | 1882        | 1927        | 1914        | 6.5     |
|                            | 0.25     | 1892        | 1908        | 1906        | 6.5     |
|                            | 0.5      | 1891        | 1902        | 1896        | 6.5     |
|                            | 0.75     | 1883        | 1905        | 1899        | 6.5     |
|                            | 1        | <b>1746</b> | <b>1855</b> | <b>1887</b> | 6.5     |
| TKM ++                     |          | 1981        | 2113        | 2211        | 0.48    |
| KM ++                      |          | 1881        | 6113        | 5011        | 0.2     |
| RAND                       |          | 8939        | 28696       | 27168       | 0.07    |

Table 17: Robust  $k$ -means++ on Synthetic dataset with  $\delta = 0.1$ .  $n = 1000, d = 2, k = 20$ . We delete the farthest 50 as outliers.

| Result                     | $\alpha$ | Cost        |             |             | Time(s) |
|----------------------------|----------|-------------|-------------|-------------|---------|
|                            |          | Min         | Mean        | Med.        |         |
| This work<br>$\delta=0.05$ | 0        | 3313        | 5135        | 5010        | 12      |
|                            | 0.25     | 3283        | 4572        | 4480        | 12      |
|                            | 0.5      | 4249        | 4808        | 4649        | 12      |
|                            | 0.75     | 2514        | 4647        | 4449        | 12      |
|                            | 1        | 2016        | 2780        | 2592        | 12      |
| This work<br>$\delta=0.1$  | 0        | 3538        | 4975        | 4673        | 6.5     |
|                            | 0.25     | 3306        | 4064        | 4178        | 6.5     |
|                            | 0.5      | 3284        | 4293        | 4146        | 6.5     |
|                            | 0.75     | 2737        | 3686        | 3554        | 6.5     |
|                            | 1        | <b>1779</b> | <b>2656</b> | <b>2657</b> | 6.5     |
| TKM ++                     |          | 2011        | 5272        | 3053        | 0.52    |
| KM ++                      |          | 2188        | 6272        | 6053        | 0.2     |
| RAND                       |          | 7428        | 22902       | 21449       | 0.07    |

Table 18: Robust  $k$ -means++ on Synthetic dataset with  $\delta = 0.1$ .  $n = 1000, d = 2, k = 20$ . We delete the farthest 120 as outliers.
